# Supplementary material for: High-pressure CO2-induced reduction of the melting temperature of ionic liquidsElectronic supplementary information (ESI) available: Fig. S1: ATR-IR spectrum of [C16mim][PF6] after it has been subjected to solution of ferrocene in CO2 at 50 °C and pressure of ca. 110 bar. See http://www.rsc.org/suppdata/cc/b2/b202759c/
Source: Royal Society of Chemistry journal article supplement (doi:10.1039/b202759c), 2002-05-20
Supplement: b202759c.doc [file b202759c.doc]

Supplementary Material (ESI) for Chemical Communications

This journal is © The Royal Society of Chemistry 2002

*

*

**Figure.** ATR-IR spectrum of [C16mim][PF6] after it has been subjected to solution of ferrocene in CO2 at 50 oC and pressure ca. 110 bar. The bands marked with an asterisk correspond to the bands of ferrocene trapped in the solid salt as a result of the impregnation into the melt. The melting of the salt was induced by the exposure to high-pressure CO2.
